# Supplementary material for: Mortality due to Vegetation Fire–Originated PM2.5 Exposure in Europe—Assessment for the Years 2005 and 2008
Source: PubMed Central journal article supplement (PMC5226696; doi:10.1289/ehp194), 2016-07-29
Supplement: EHP194.s001.acco.pdf [file EHP194.s001.acco.pdf]

**Note to readers with disabilities:** *EHP* strives to ensure that all journal content is accessible to all readers. However, some figures and Supplemental Material published in *EHP* articles may not conform to [508 standards](#) due to the complexity of the information being presented. If you need assistance accessing journal content, please contact [ehp508@niehs.nih.gov](mailto:ehp508@niehs.nih.gov). Our staff will work with you to assess and meet your accessibility needs within 3 working days.

## **Supplemental Material**

### **Mortality due to Vegetation-Fire Originated PM<sub>2.5</sub> Exposure in Europe – Assessment for the Years 2005 and 2008**

Virpi Kollanus, Marje Prank, Alexandra Gens, Joana Soares, Julius Vira, Jaakko Kukkonen, Mikhail Sofiev, Raimo O. Salonen, and Timo Lanki

#### **Table of Contents**

**Table S1.** Relative frequency of the modelled daily average grid-cell concentrations of vegetation-fire originated PM<sub>2.5</sub> divided into seven exposure categories in 2005.

**Table S2.** Relative frequency of the modelled daily average grid-cell concentrations of vegetation-fire originated PM<sub>2.5</sub> divided into seven exposure categories in 2008.

**Table S3.** PM<sub>2.5</sub> emissions from vegetation fires in 2005 and 2008 (modelling domain extending from 35 to 70 degrees North and 15 degrees West to 35 degrees East).

**Figure S1.** Deviations of mean temperature (Celsius degrees) and total precipitation (mm) in 2005 and 2008 from the average in 2005-2011 (April-October). The temperature and precipitation data originate from the operational archives of the European Centre for Medium-Range Weather Forecasts (ECMWF 2016).

**Figure S2.** Mean wind speed (m/s, 500 m height from the ground) and direction in 2005 and 2008 (April-October). The wind data originate from the operational archives of the European Centre for Medium-Range Weather Forecasts (ECMWF 2016).

**Figure S3.** Annual variation in particulate matter (PM) emissions from vegetation fires in selected world regions based on the Integrated Monitoring System for Wildland Fires (IS4FIRES, FMI 2016a). Europe = the geographical Europe (17 degrees West to 50 degrees East, 33 to 75 degrees North).

**Figure S4.** Measured and modelled monthly average concentrations of PM<sub>2.5</sub> components at air-quality monitoring stations in a) Spain (strongly affected by vegetation fires) and b) Austria (mainly affected by other emission sources). Dots are the measured total PM<sub>2.5</sub> concentrations and shades are the stacked modelled concentrations of different components simulated by using the chemical transport model System for Integrated modelLling of Atmospheric coMposition (SILAM, FMI 2016b). PPMr is the primary anthropogenic PM<sub>2.5</sub>, EC is elemental carbon, and fire-PM is vegetation-fire originated PM<sub>2.5</sub>.

### **References**

**Table S1.** Relative frequency of the modelled daily average grid-cell concentrations<sup>a</sup> of vegetation-fire originated PM<sub>2.5</sub> divided into seven exposure categories in 2005.

| Region, country               | <0.1 µg/m <sup>3</sup> | 0.1-1 µg/m <sup>3</sup> | 1-5 µg/m <sup>3</sup> | 5-10 µg/m <sup>3</sup> | 10-20 µg/m <sup>3</sup> | 20-50 µg/m <sup>3</sup> | >50 µg/m <sup>3</sup> |
|-------------------------------|------------------------|-------------------------|-----------------------|------------------------|-------------------------|-------------------------|-----------------------|
| <b><i>Northern Europe</i></b> | <b>91.6%</b>           | <b>7.1%</b>             | <b>1.2%</b>           | <b>0.04%</b>           | <b>0.01%</b>            | <b>0.01%</b>            | <b>0.001%</b>         |
| Denmark                       | 83.1%                  | 14.6%                   | 2.3%                  | 0.01%                  | 0%                      | 0%                      | 0%                    |
| Finland                       | 92.0%                  | 6.7%                    | 1.2%                  | 0.1%                   | 0.03%                   | 0.01%                   | 0%                    |
| Norway                        | 94.8%                  | 4.6%                    | 0.6%                  | 0.02%                  | 0.01%                   | 0.01%                   | 0%                    |
| Sweden                        | 91.2%                  | 7.3%                    | 1.4%                  | 0.03%                  | 0.01%                   | 0.004%                  | 0.003%                |
| <b><i>Eastern Europe</i></b>  | <b>71.2%</b>           | <b>20.4%</b>            | <b>7.4%</b>           | <b>0.5%</b>            | <b>0.3%</b>             | <b>0.2%</b>             | <b>0.02%</b>          |
| Bulgaria                      | 64.5%                  | 22.6%                   | 10.0%                 | 1.3%                   | 1.0%                    | 0.5%                    | 0.1%                  |
| Czech Republic                | 68.7%                  | 24.0%                   | 6.8%                  | 0.4%                   | 0.1%                    | 0.01%                   | 0%                    |
| Estonia                       | 88.0%                  | 9.1%                    | 2.8%                  | 0.1%                   | 0%                      | 0%                      | 0%                    |
| Hungary                       | 66.2%                  | 23.6%                   | 9.1%                  | 0.5%                   | 0.3%                    | 0.2%                    | 0.02%                 |
| Latvia                        | 84.3%                  | 12.1%                   | 3.5%                  | 0.1%                   | 0%                      | 0%                      | 0%                    |
| Lithuania                     | 80.1%                  | 15.1%                   | 4.6%                  | 0.1%                   | 0.01%                   | 0.02%                   | 0.04%                 |
| Poland                        | 71.7%                  | 21.7%                   | 6.4%                  | 0.2%                   | 0.03%                   | 0.002%                  | 0%                    |
| Romania                       | 66.3%                  | 21.4%                   | 10.4%                 | 0.7%                   | 0.6%                    | 0.5%                    | 0.1%                  |
| Slovenia                      | 74.4%                  | 20.6%                   | 4.5%                  | 0.5%                   | 0.1%                    | 0.01%                   | 0%                    |
| Slovakia                      | 65.5%                  | 24.8%                   | 8.8%                  | 0.6%                   | 0.3%                    | 0.1%                    | 0%                    |
| <b><i>Western Europe</i></b>  | <b>80.6%</b>           | <b>15.8%</b>            | <b>3.3%</b>           | <b>0.2%</b>            | <b>0.05%</b>            | <b>0.005%</b>           | <b>0.001%</b>         |
| Austria                       | 75.9%                  | 18.9%                   | 4.6%                  | 0.5%                   | 0.1%                    | 0.01%                   | 0%                    |
| Belgium                       | 70.1%                  | 21.4%                   | 7.6%                  | 0.8%                   | 0.1%                    | 0%                      | 0%                    |
| France                        | 78.8%                  | 17.6%                   | 3.2%                  | 0.3%                   | 0.1%                    | 0.01%                   | 0.003%                |
| Germany                       | 72.1%                  | 22.6%                   | 5.1%                  | 0.2%                   | 0.02%                   | 0.001%                  | 0%                    |
| Ireland                       | 95.8%                  | 3.8%                    | 0.4%                  | 0%                     | 0%                      | 0%                      | 0%                    |
| Luxembourg                    | 69.5%                  | 21.7%                   | 7.9%                  | 0.5%                   | 0.3%                    | 0%                      | 0%                    |
| Netherlands                   | 70.3%                  | 22.3%                   | 6.9%                  | 0.5%                   | 0.05%                   | 0%                      | 0%                    |
| Switzerland                   | 85.4%                  | 13.0%                   | 1.5%                  | 0.1%                   | 0%                      | 0%                      | 0%                    |
| United Kingdom                | 91.8%                  | 6.7%                    | 1.4%                  | 0.1%                   | 0.03%                   | 0%                      | 0%                    |
| <b><i>Southern Europe</i></b> | <b>72.2%</b>           | <b>20.5%</b>            | <b>5.4%</b>           | <b>0.9%</b>            | <b>0.5%</b>             | <b>0.3%</b>             | <b>0.2%</b>           |
| Greece                        | 64.7%                  | 26.3%                   | 7.8%                  | 0.9%                   | 0.2%                    | 0.02%                   | 0%                    |
| Italy                         | 71.9%                  | 22.3%                   | 5.1%                  | 0.6%                   | 0.1%                    | 0.03%                   | 0%                    |
| Portugal                      | 71.7%                  | 15.3%                   | 6.7%                  | 2.0%                   | 1.6%                    | 1.5%                    | 1.1%                  |
| Spain                         | 76.9%                  | 16.4%                   | 4.2%                  | 1.0%                   | 0.7%                    | 0.6%                    | 0.2%                  |
| <b><i>All regions</i></b>     | <b>78.6%</b>           | <b>16.2%</b>            | <b>4.3%</b>           | <b>0.4%</b>            | <b>0.2%</b>             | <b>0.1%</b>             | <b>0.1%</b>           |

<sup>a</sup>Estimated based on emissions from the Integrated Monitoring System for Wildland Fires (IS4FIRES, FMI 2016a) and chemical transport model the System for Integrated modelLing of Atmospheric coMposition (SILAM, FMI 2016b).

**Table S2.** Relative frequency of the modelled daily average grid-cell concentrations<sup>a</sup> of vegetation-fire originated PM<sub>2.5</sub> divided into seven exposure categories in 2008.

| Region, country               | <0.1 µg/m <sup>3</sup> | 0.1-1 µg/m <sup>3</sup> | 1-5 µg/m <sup>3</sup> | 5-10 µg/m <sup>3</sup> | 10-20 µg/m <sup>3</sup> | 20-50 µg/m <sup>3</sup> | >50 µg/m <sup>3</sup> |
|-------------------------------|------------------------|-------------------------|-----------------------|------------------------|-------------------------|-------------------------|-----------------------|
| <b><i>Northern Europe</i></b> | <b>94.6%</b>           | <b>4.8%</b>             | <b>0.5%</b>           | <b>0.02%</b>           | <b>0.0005%</b>          | <b>0.001%</b>           | <b>0%</b>             |
| Denmark                       | 89.2%                  | 10.0%                   | 0.8%                  | 0.01%                  | 0%                      | 0%                      | 0%                    |
| Finland                       | 94.7%                  | 4.5%                    | 0.8%                  | 0.02%                  | 0%                      | 0%                      | 0%                    |
| Norway                        | 97.0%                  | 2.8%                    | 0.1%                  | 0.005%                 | 0%                      | 0.003%                  | 0%                    |
| Sweden                        | 94.5%                  | 5.0%                    | 0.5%                  | 0.02%                  | 0.001%                  | 0%                      | 0%                    |
| <b><i>Eastern Europe</i></b>  | <b>72.0%</b>           | <b>20.3%</b>            | <b>5.8%</b>           | <b>1.0%</b>            | <b>0.7%</b>             | <b>0.3%</b>             | <b>0.01%</b>          |
| Bulgaria                      | 58.7%                  | 23.8%                   | 11.7%                 | 2.8%                   | 2.0%                    | 1%                      | 0.04%                 |
| Czech Republic                | 73.1%                  | 23.3%                   | 3.4%                  | 0.2%                   | 0.01%                   | 0%                      | 0%                    |
| Estonia                       | 86.9%                  | 10.3%                   | 2.6%                  | 0.1%                   | 0.1%                    | 0.0%                    | 0%                    |
| Hungary                       | 65.1%                  | 25.6%                   | 8.1%                  | 0.8%                   | 0.4%                    | 0.1%                    | 0%                    |
| Latvia                        | 84.6%                  | 12.3%                   | 2.7%                  | 0.2%                   | 0.1%                    | 0.1%                    | 0%                    |
| Lithuania                     | 82.9%                  | 13.4%                   | 3.4%                  | 0.2%                   | 0.04%                   | 0.1%                    | 0%                    |
| Poland                        | 75.8%                  | 20.9%                   | 3.1%                  | 0.1%                   | 0.1%                    | 0.005%                  | 0%                    |
| Romania                       | 65.9%                  | 20.8%                   | 8.3%                  | 2.2%                   | 1.7%                    | 1.0%                    | 0.1%                  |
| Slovenia                      | 75.7%                  | 20.2%                   | 4.1%                  | 0.1%                   | 0.04%                   | 0%                      | 0%                    |
| Slovakia                      | 67.7%                  | 25.4%                   | 6.3%                  | 0.4%                   | 0.2%                    | 0%                      | 0%                    |
| <b><i>Western Europe</i></b>  | <b>85.0%</b>           | <b>12.9%</b>            | <b>2.0%</b>           | <b>0.1%</b>            | <b>0.02%</b>            | <b>0.001%</b>           | <b>0%</b>             |
| Austria                       | 81.2%                  | 15.3%                   | 3.0%                  | 0.4%                   | 0.1%                    | 0.01%                   | 0%                    |
| Belgium                       | 77.4%                  | 17.7%                   | 4.8%                  | 0.1%                   | 0%                      | 0%                      | 0%                    |
| France                        | 86.4%                  | 11.6%                   | 1.9%                  | 0.1%                   | 0.02%                   | 0.001%                  | 0%                    |
| Germany                       | 78.3%                  | 18.9%                   | 2.8%                  | 0.1%                   | 0.02%                   | 0%                      | 0%                    |
| Ireland                       | 93.6%                  | 5.9%                    | 0.5%                  | 0.03%                  | 0%                      | 0%                      | 0%                    |
| Luxembourg                    | 82.0%                  | 14.7%                   | 3.2%                  | 0.1%                   | 0%                      | 0%                      | 0%                    |
| Netherlands                   | 74.8%                  | 20.4%                   | 4.6%                  | 0.1%                   | 0.02%                   | 0%                      | 0%                    |
| Switzerland                   | 90.3%                  | 9.0%                    | 0.7%                  | 0.04%                  | 0%                      | 0%                      | 0%                    |
| United Kingdom                | 90.5%                  | 8.4%                    | 1.1%                  | 0.01%                  | 0%                      | 0%                      | 0%                    |
| <b><i>Southern Europe</i></b> | <b>76.6%</b>           | <b>16.8%</b>            | <b>5.4%</b>           | <b>0.9%</b>            | <b>0.3%</b>             | <b>0.05%</b>            | <b>0.002%</b>         |
| Greece                        | 61.7%                  | 22.7%                   | 11.8%                 | 2.7%                   | 1.0%                    | 0.1%                    | 0%                    |
| Italy                         | 71.3%                  | 20.9%                   | 6.9%                  | 0.7%                   | 0.2%                    | 0.1%                    | 0.01%                 |
| Portugal                      | 88.8%                  | 10.2%                   | 0.9%                  | 0.1%                   | 0.01%                   | 0%                      | 0%                    |
| Spain                         | 87.6%                  | 11.1%                   | 1.2%                  | 0.1%                   | 0.02%                   | 0.01%                   | 0%                    |
| <b><i>All regions</i></b>     | <b>82.0%</b>           | <b>13.7%</b>            | <b>3.5%</b>           | <b>0.5%</b>            | <b>0.2%</b>             | <b>0.1%</b>             | <b>0.004%</b>         |

<sup>a</sup>Estimated based on emissions from the Integrated Monitoring System for Wildland Fires (IS4FIRES, FMI 2016a) and chemical transport model the System for Integrated modelLING of Atmospheric coMposition (SILAM, FMI 2016b).

**Table S3.** PM<sub>2.5</sub> emissions<sup>a</sup> from vegetation fires in 2005 and 2008 (modelling domain extending from 35 to 70 degrees North and 15 degrees West to 35 degrees East).

| <b>Country</b>         | <b>2005 [Ton]</b> | <b>2008 [Ton]</b> |
|------------------------|-------------------|-------------------|
| Algeria                | 64044             | 54728             |
| Morocco                | 9064              | 696               |
| Tunisia                | 3751              | 6342              |
| Albania                | 2529              | 6919              |
| Andorra                | 9                 | 0                 |
| Austria                | 11900             | 14081             |
| Belarus                | 4200              | 6111              |
| Belgium                | 1557              | 1085              |
| Bosnia and Herzegovina | 816               | 5907              |
| Bulgaria               | 22526             | 28917             |
| Croatia                | 2206              | 4752              |
| Czech                  | 2791              | 2326              |
| Denmark                | 987               | 426               |
| Estonia                | 68                | 3752              |
| Finland                | 6820              | 1177              |
| France                 | 47656             | 23931             |
| Germany                | 25652             | 25649             |
| Greece                 | 13978             | 40246             |
| Hungary                | 6186              | 9937              |
| Ireland                | 188               | 510               |
| Italy                  | 153542            | 227692            |
| Latvia                 | 338               | 52                |
| Lithuania              | 44333             | 329               |
| Luxemburg              | 273               | 128               |
| Macedonia              | 18660             | 23290             |
| Malta                  | 0                 | 0                 |
| Moldova                | 6665              | 19194             |
| Netherlands            | 9244              | 8344              |
| Norway                 | 1626              | 9264              |
| Poland                 | 11123             | 12448             |
| Portugal               | 591463            | 9467              |
| Romania                | 52407             | 111064            |
| Russia                 | 20479             | 34247             |
| Serbia & Montenegro    | 5250              | 20374             |
| Slovakia               | 5291              | 3886              |
| Slovenia               | 116               | 71                |
| Spain                  | 262075            | 30464             |
| Sweden                 | 5883              | 6419              |
| Switzerland            | 22                | 61                |
| Turkey                 | 30040             | 57922             |
| Ukraine                | 179094            | 390773            |
| United Kingdom         | 7243              | 8492              |
| <b>TOTAL</b>           | <b>1632096</b>    | <b>1211473</b>    |

<sup>a</sup>Estimated based on emissions from the Integrated Monitoring System for Wildland Fires (IS4FIRES, FMI 2016a)

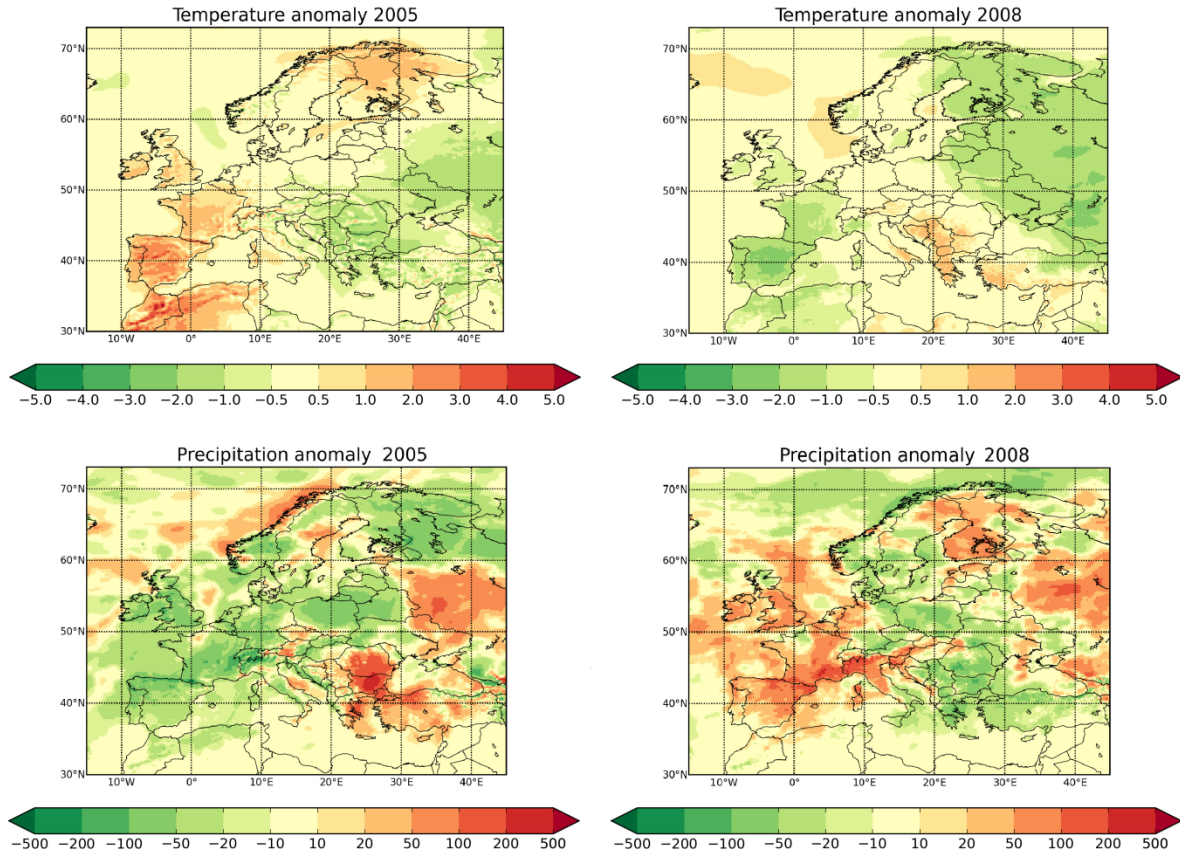

**Figure S1.** Deviations of mean temperature (Celsius degrees) and total precipitation (mm) in 2005 and 2008 from the average in 2005-2011 (April-October). The temperature and precipitation data originate from the operational archives of the European Centre for Medium-Range Weather Forecasts (ECMWF 2016).

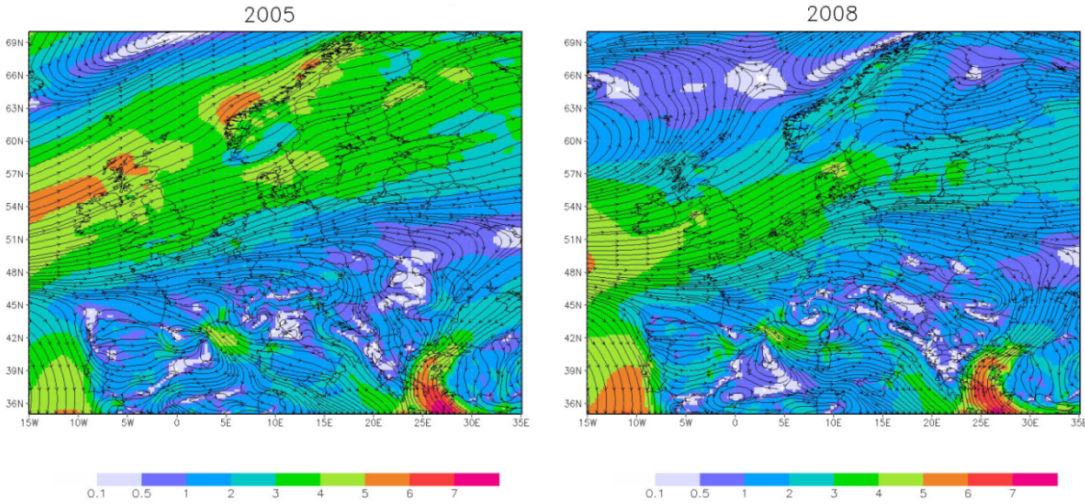

**Figure S2.** Mean wind speed (m/s, 500 m height from the ground) and direction in 2005 and 2008 (April-October). The wind data originate from the operational archives of the European Centre for Medium-Range Weather Forecasts (ECMWF 2016).

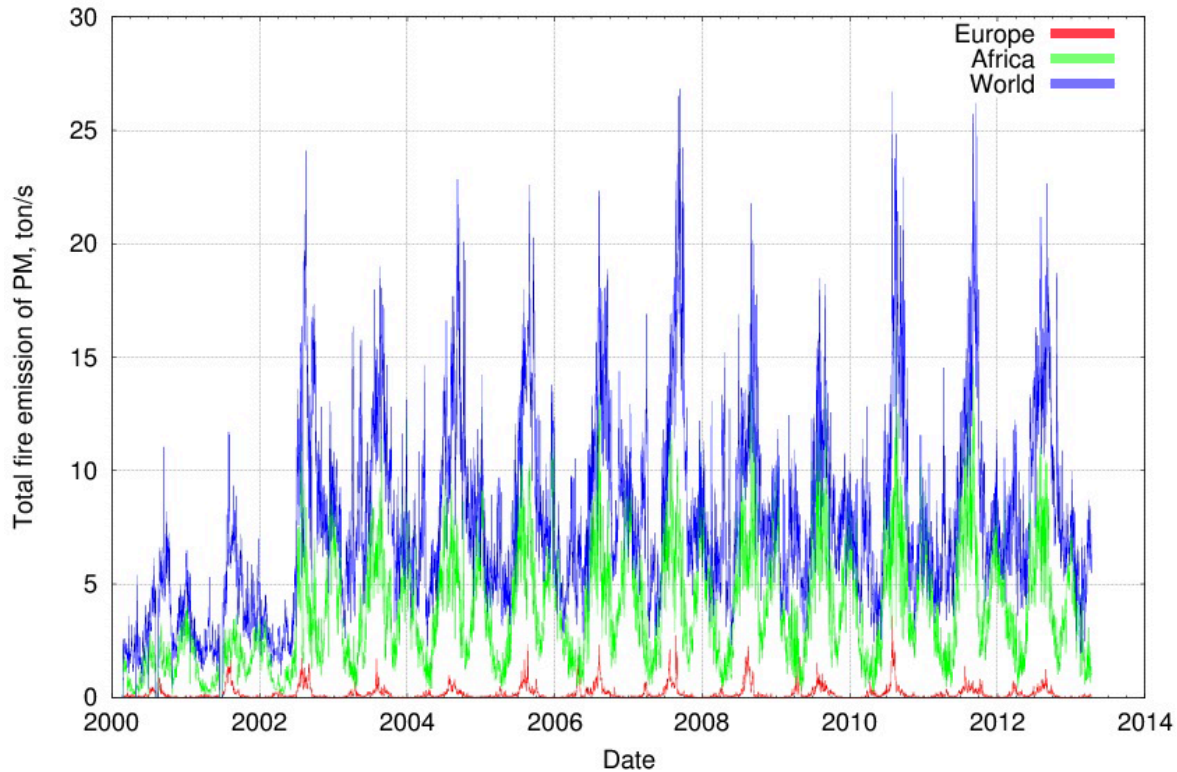

**Figure S3.** Annual variation in particulate matter (PM) emissions from vegetation fires in selected world regions based on the Integrated Monitoring System for Wildland Fires (IS4FIRES, FMI 2016a). Europe = the geographical Europe (17 degrees West to 50 degrees East, 33 to 75 degrees North).

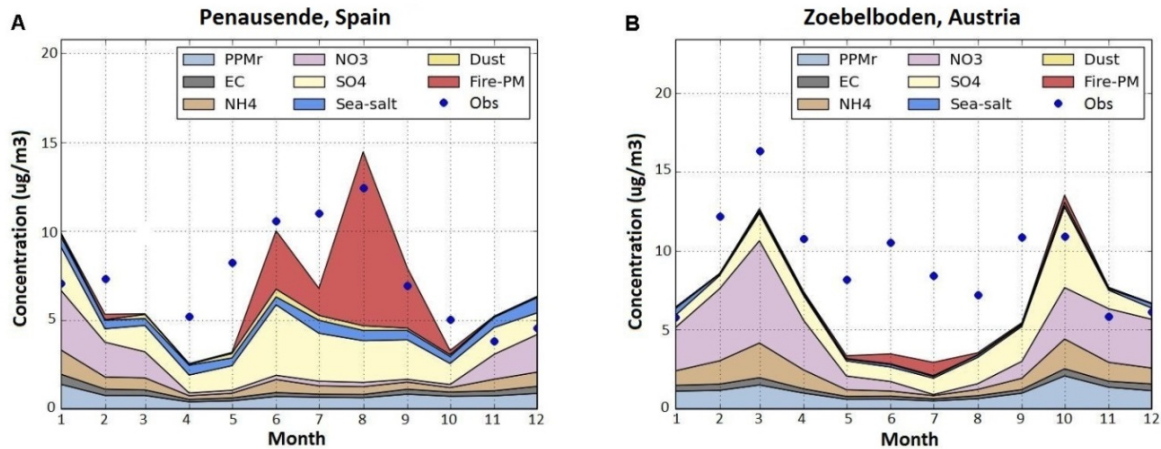

**Figure S4.** Measured and modelled monthly average concentrations of  $PM_{2.5}$  components at air-quality monitoring stations in a) Spain (strongly affected by vegetation fires) and b) Austria (mainly affected by other emission sources). Dots are the measured total  $PM_{2.5}$  concentrations and shades are the stacked modelled concentrations of different components simulated by using the chemical transport model System for Integrated modelLing of Atmospheric coMposition (SILAM, FMI 2016b). PPMr is the primary anthropogenic  $PM_{2.5}$ , EC is elemental carbon, and fire-PM is vegetation-fire originated  $PM_{2.5}$ .



## References

ECMWF (European Centre for Medium-Range Weather Forecasts). 2016. Set I - Atmospheric Model high resolution 10-day forecast (HRES). Available: <http://www.ecmwf.int/en/forecasts/datasets/set-i> [accessed 18 May 2016].

FMI (Finnish Meteorological Institute). 2016a. IS4FIRES – An integrated monitoring and modelling system for wildland fires. Available: <http://is4fires.fmi.fi/> [accessed 27 May 2016].

FMI (Finnish Meteorological Institute). 2016b. SILAM v.5.x. Available: <http://silam.fmi.fi/> [accessed 27 May 2016].
